# Supplementary material
Source: PubMed Central journal article supplement (PMC2840470)
Supplement: 0906548107_pnas.0906548107_SI.pdf [file 0906548107_pnas.0906548107_SI.pdf]

# Supporting Information

Unger et al. 10.1073/pnas.0906548107

## SI Text SI Methods

We applied the NASA Goddard Institute for Space Studies (GISS) atmospheric composition-climate model described in detail and comprehensively evaluated in (22). Briefly, the model comprises the GISS version ModelE general circulation model (35) with embedded fully interactive photochemistry and aerosol modules. We use 23 vertical layers (model top in the mesosphere) and  $4 \times 5$  degree latitudinal by longitudinal horizontal resolution. The atmospheric composition-climate model includes full coupling between tropospheric gas-phase and aerosol chemistry (36, 37) and aerosols and cloud microphysics for liquid-phase stratus and cumulus clouds (38). The aerosols are assumed to be externally mixed. The direct instantaneous TOA RF by the SLS is calculated internally within the climate model's radiation scheme (35). We estimate the RF due to AIE from the difference between the net radiation at the TOA and all direct radiative effects (38).

**Simulations.** In all simulations using the atmospheric composition-climate model, monthly mean sea surface temperatures and sea ice climatologies are prescribed for 1990–1999 (1). Methane concentration is prescribed to hemispherically averaged values (NH = 1,814 ppb and SH = 1,733 ppb) based on observations for the year 2000 (2). A present day control simulation is performed based on the emissions inventory described in the paper and Table S1. In order to quantify the short-lived species (SLS) radiative forcing (RF) attributable to each emission sector, we performed sensitivity simulations in which we removed all emissions from that sector. Each simulation was run for 12 model years; the first 2 years of the simulations are discarded as spin-up and the remaining 10 years are averaged. The contributions to RF by the individual emissions sectors for each SLS are then determined by taking the difference between the control simulation and the simulation with a missing sector. A further simulation was performed in which all sectors were removed simultaneously.

**CH<sub>4</sub> RF Due to Indirect Chemical Effects on the CH<sub>4</sub> Lifetime.** Indirect CH<sub>4</sub> RF is determined using the method described in ref. 3. First the change in atmospheric CH<sub>4</sub> concentration due to each emission sector is calculated based on the initial change in the CH<sub>4</sub> lifetime in the climate model and accounting for the feedback of CH<sub>4</sub> on its own lifetime. Then the CH<sub>4</sub> RF is calculated using a standard simplified expression based on the steady-state concentration change (4). Both direct and indirect CH<sub>4</sub> changes also affect O<sub>3</sub> on the longer time scale of the CH<sub>4</sub> lifetime. We quantify this secondary O<sub>3</sub> RF (denoted “M-O<sub>3</sub>”) using global average sensitivity results from previous multimodel assessment studies (3, 4).

**Aerosol Indirect Effect.** Aerosol mass concentrations are converted to aerosol number concentrations assuming log-normal distributions and are related to cloud droplet number concentrations (CDNC) through empirical equations. Additionally, effects of changes to cloud cover and turbulence on CDNC are also included. To represent aerosol effects on precipitation, the auto-conversion scheme in the model is modified to include a dependence on droplet size (as well as CDNC and droplet dispersion effects) such that autoconversion is triggered if droplet sizes exceed 14  $\mu\text{m}$  (5). Model simulated aerosol-cloud interactions been evaluated with satellite-based retrievals to constrain the magnitude of the aerosol indirect effect (AIE) (6). Results indicate that the AIE may be overpredicted over the ocean regions due to an underprediction of cloud droplet size and an overprediction of cloud optical depth. Simulated CDNC was found to be within satellite retrieved uncertainty. Over land locations, coincident retrievals of aerosols and cloud properties are not easily available from satellites and thus evaluation of changes to cloud properties from aerosols is more difficult. A more meaningful global evaluation of the AIE is challenging in the absence of global observations of CDNC that serve as the main link between aerosols and cloud properties.

1. Rayner NA, et al. (2003) Global analyses of sea surface temperature, sea ice, and night marine air temperature since the late nineteenth century. *J Geophys Res* 108(D14):4407–4443.
2. Dlugokencky EJ, et al. (2003) Atmospheric methane levels off: Temporary pause or a new steady-state? *Geophys Res Lett* 30(19):1992–1995.
3. Bernsten TK, et al. (2005) Response of climate to regional emissions of ozone precursors: Sensitivities and warming potentials. *Tellus* 57B:283–304.
4. Ramaswamy V, et al. (2001) *Radiative Forcing of Climate Change. In Climate Change 2001: The Scientific Basis. Contribution of Working Group I to the Third Assessment Report of the Intergovernmental Panel on Climate Change* (Cambridge Univ. Press, Cambridge, UK).
5. Rotstayn LD, Liu Y (2005) A smaller global estimate of the second indirect aerosol effect. *Geophys Res Lett* 32:L05708–doi:10.1029/2004GL021922
6. Menon S, et al. (2008) Analyzing signatures of aerosol-cloud interactions from satellite retrievals and the GISS GCM to constrain the aerosol indirect effect. *J Geophys Res* 113:D14522–doi:10.1029/2007JD009442
7. Olivier JGJ, van Aardenne JA, Dentener F, Ganzeveld L, Peters JAHW (2005) Recent trends in global greenhouse gas emissions: regional trends 1970–2000 and spatial distribution of key sources in 2000. *Environm Sci* 2:81–99.
8. Bond TC, et al. (2004) A technology-based global inventory of black and organic carbon emissions from combustion. *J Geophys Res* 109:D14203–doi:10.1029/2003JD003697

**Table S1. Global anthropogenic emissions inventory based on Edgar Fast Track 2000 (7, 8); units for CO, NMVOC, SO<sub>2</sub>, CH<sub>4</sub>, N<sub>2</sub>O, and CO<sub>2</sub> are Teragram (Tg)Full Molecular Mass (FMM)/year; units for NO<sub>x</sub> and NH<sub>3</sub> are TgNitrogen(N)/year; units for black carbon and organic carbon are Gigagram(GgFMM/year)**

| Sector                         | Precursor PreSpecies |     |       |                 |      |       |                 |                 |                  |                 |
|--------------------------------|----------------------|-----|-------|-----------------|------|-------|-----------------|-----------------|------------------|-----------------|
|                                | NO <sub>x</sub>      | CO  | NMVOC | SO <sub>2</sub> | BC   | OC    | CH <sub>4</sub> | NH <sub>3</sub> | N <sub>2</sub> O | CO <sub>2</sub> |
| Industry                       | 6.0                  | 51  | 33.6  | 63.2            | 769  | 2559  | 2.7             | 0.2             | 0.7              | 8414            |
| Power                          | 7.8                  | 12  | 33.3  | 57.7            | 22   | 18    | 93.9            | 0.1             | 0.1              | 9127            |
| Household fossil fuel          | 0.9                  | 27  | 1.2   | 8.1             | 453  | 486   | 1.7             | 2.2             | 0.02             | 3390            |
| Household biofuel              | 2.2                  | 237 | 27.3  | 3.1             | 1471 | 7823  | 13.8            | 0               | 0.2              | 495             |
| On-road transportation         | 8.7                  | 186 | 33.8  | 3.7             | 1235 | 1630  | 0.9             | 0               | 0.1              | 4276            |
| Off-road (land) transportation | 1.8                  | 13  | 4.6   | 2.0             | 588  | 292   | 0.008           | 0               | 0.003            | 390             |
| Shipping                       | 2.9                  | 0.1 | 0.02  | 7.3             | 97   | 136   | 0.028           | 0               | 0.003            | 428             |
| Aviation                       | 0.7                  | 0   | 0     | 0.2             | 11   | 0     | 0.006           | 0               | 0.020            | 654             |
| Agricultural waste burning     | 0.2                  | 16  | 2.0   | 0.2             | 371  | 2266  | 0.8             | 1.4             | 0.020            | 0               |
| Waste/landfill                 | 0.04                 | 4   | 2.7   | 0.05            | 0    | 0     | 58.2            | 2.7             | 0.3              | 0               |
| Biomass burning                | 10.2                 | 507 | 31.3  | 2.7             | 3500 | 37200 | 21.2            | 1.8             | 0.9              | 2740            |
| Animals                        | 0                    | 0   | 0     | 0               | 0    | 0     | 88.5            | 21.1            | 3.2              | 0               |
| Agriculture                    | 0                    | 0   | 0     | 0               | 0    | 0     | 39.4            | 12.6            | 6.6              | 0               |

**Table S2. Global annual average direct RF due to SLS and AIE RF by sector**

|                       | Ozone, S-O <sub>3</sub> | Sulfate   | Nitrate  | Black carbon | Organic carbon | AIE        |
|-----------------------|-------------------------|-----------|----------|--------------|----------------|------------|
| Industry              | 14* (3)                 | -192* (3) | 47* (1)  | 49* (1)      | -15* (3)       | -275* (49) |
| Power                 | 7* (2)                  | -164* (3) | 25* (2)  | 4 (1)        | 4 (3)          | -182* (46) |
| Biomass burning       | 60* (3)                 | -11* (2)  | -21* (2) | 131* (1)     | -203* (2)      | -179* (50) |
| Agriculture           | -7* (3)                 | 1 (3)     | -59* (2) | -1 (1)       | 1 (2)          | —          |
| Aviation              | 3 (3)                   | -17* (3)  | -3* (1)  | 3 (2)        | 1 (3)          | —          |
| Agr. waste burning    | 1 (2)                   | -11* (3)  | -11* (2) | 21* (4)      | -19* (2)       | —          |
| Household fossil fuel | 2 (2)                   | -26* (5)  | -6* (2)  | 25* (1)      | -5* (2)        | —          |
| Shipping              | 3 (2)                   | -16* (5)  | -16* (2) | 3 (2)        | -3 (2)         | —          |
| Off-road land         | 2 (2)                   | -10* (4)  | -7* (2)  | 33* (2)      | -2 (3)         | —          |
| On-road               | 26* (2)                 | -14* (2)  | -25* (2) | 71* (2)      | -16* (2)       | 43* (33)   |
| Household biofuel     | 21* (2)                 | -7 (4)    | -4* (2)  | 82* (1)      | -64* (2)       | 32* (30)   |
| Animals               | -4 (3)                  | 5 (3)     | -83* (2) | -2 (1)       | 3 (3)          | —          |
| Waste/landfill        | -2 (2)                  | -6 (3)    | -16* (2) | 1 (1)        | -1 (3)         | —          |

Values marked with \* indicate significance at 95% confidence level and bracketed numbers indicate standard error relative to internal climate variability based on 10 years of model output. AIE RF values are shown only for results with significance at 95% confidence level. Units are mWm<sup>-2</sup>.

**Table S3. Global annual average RF from methane direct effects (D-CH<sub>4</sub>) and indirect chemical effects of SLS precursors on CH<sub>4</sub> lifetime (I-CH<sub>4</sub>) and associated secondary ozone RF (M-O<sub>3</sub>) (mWm<sup>-2</sup>)**

|                       | Direct Methane Emission |                  | Indirect chemical Effect |                  |
|-----------------------|-------------------------|------------------|--------------------------|------------------|
|                       | D-CH <sub>4</sub>       | M-O <sub>3</sub> | I-CH <sub>4</sub>        | M-O <sub>3</sub> |
| Industry              | 4                       | 1                | -9                       | -4               |
| Power                 | 128                     | 46               | -21                      | -9               |
| Biomass burning       | 28                      | 11               | 6                        | 2                |
| Agriculture           | 53                      | 19               | 0.4                      | 0.2              |
| Aviation              | 0                       | 0                | -6                       | -3               |
| Agr. waste burning    | 1                       | 0.4              | 3                        | 1                |
| Household fossil fuel | 2                       | 0.8              | 2                        | 1                |
| Shipping              | 0.1                     | 0.01             | -18                      | -7               |
| Off-road land         | 0                       | 0                | -4                       | -2               |
| On-road               | 1.2                     | 0.4              | 1.3                      | 0.6              |
| Household biofuel     | 18                      | 7                | 24                       | 10               |
| Animals               | 120                     | 43               | 2                        | 1                |
| Waste/landfill        | 78                      | 29               | -0.5                     | 0.2              |
| Sum                   | 433                     | 158              | -20                      | -9               |

**Table S4. Global annual average RF by long-lived greenhouse gases due to perpetual constant year 2000 emissions by sector calculated using the MAGICC model at future time points 2020 and 2100 relative to 2000 (mWm<sup>-2</sup>)**

|                       | Future impact of year 2000 emissions |                 |                  |                 |
|-----------------------|--------------------------------------|-----------------|------------------|-----------------|
|                       | 2020                                 |                 | 2100             |                 |
|                       | N <sub>2</sub> O                     | CO <sub>2</sub> | N <sub>2</sub> O | CO <sub>2</sub> |
| Industry              | 3                                    | 219             | 10               | 653             |
| Power                 | 0.4                                  | 240             | 1.4              | 714             |
| Biomass burning       | 3                                    | 68              | 12               | 186             |
| Agriculture           | 26                                   | 0               | 95               | 0               |
| Aviation              | 0                                    | 16              | 0                | 49              |
| Agr. waste burning    | 0                                    | 0               | 0                | 0               |
| Household fossil fuel | 0                                    | 88              | 0                | 258             |
| Shipping              | 0                                    | 11              | 0                | 32              |
| Off-road land         | 0                                    | 10              | 0                | 29              |
| On-road               | 0.4                                  | 110             | 2                | 326             |
| Household biofuel     | 0.6                                  | 13              | 2                | 38              |
| Animals               | 12                                   | 0               | 45               | 0               |
| Waste/landfill        | 1                                    | 0.4             | 4                | 2               |
| Sum                   | 46                                   | 775             | 171              | 2287            |

**Table S5. Uncertainties in sectoral RFs. Total RF by sector at 2020 and 2100 and the ratio of the SLS/LLGHG RF at each time point (SLS includes CH<sub>4</sub>). RF uncertainty is given in terms of internal variability in the climate model based on the standard error of the mean for 10 years of model output, and in terms of the emission rate for the SLS, in both cases as a percentage of the total sector RF. Sectors that emit species with opposing RF and high uncertainties are indicated using '\*\*'.**

| SECTOR                         | RF at 2020 | SLS/LLGHG at 2020 | RF at 2100 | SLS/LLGHG at 2100 | Uncertainty due to internal climate variability at 2020 | Uncertainty due to emission rate at 2020 | Large opposing uncertainties |
|--------------------------------|------------|-------------------|------------|-------------------|---------------------------------------------------------|------------------------------------------|------------------------------|
| Power                          | 79         | -0.7              | 554        | -0.2              | 70%                                                     | 50%                                      |                              |
| On-road transportation         | 199        | 0.8               | 417        | 0.3               | 20%                                                     | 40%                                      |                              |
| Household fossil fuel          | 84         | -0.05             | 254        | -0.01             | 10%                                                     | 10%                                      | *                            |
| Household biofuel              | 132        | 8.7               | 159        | 3                 | 30%                                                     | 160%                                     | *                            |
| Animal husbandry               | 98         | 7.2               | 131        | 1.9               | 10%                                                     | 90%                                      |                              |
| Industry                       | -158       | -1.7              | 283        | -0.6              | 40%                                                     | 120%                                     | *                            |
| Agriculture                    | 29         | 0.1               | 98         | 0.03              | 40%                                                     | 10%                                      |                              |
| Waste/Landfill                 | 84         | 58.9              | 88         | 13.7              | 10%                                                     | 100%                                     |                              |
| Off-road (land) transportation | 20         | 1                 | 39         | 0.3               | 70%                                                     | 60%                                      | *                            |
| Aviation                       | -6         | -1.4              | 27         | -0.4              | 200%                                                    | 180%                                     |                              |
| Agriculture waste burning      | -14        | N/A               | -14        | N/A               | 90%                                                     | 250%                                     | *                            |
| Biomass burning                | -106       | -2.5              | 22         | -0.9              | 60%                                                     | 420%                                     | *                            |
| Shipping                       | -43        | -4.9              | -22        | -1.7              | 30%                                                     | 130%                                     | *                            |

**Table S6. Comparison of total RF by species summed over all sectors to relevant Intergovernmental Panel on Climate Change (IPCC) AR4 values**

| Component                                        | IPCC AR4          | This study |
|--------------------------------------------------|-------------------|------------|
| CH <sub>4</sub>                                  | 0.48 [± 0.05]     | +0.41      |
| Total tropospheric O <sub>3</sub>                | +0.35 [−0.1,+0.3] | +0.42      |
| Tropospheric O <sub>3</sub> from CH <sub>4</sub> | +0.2              | +0.15      |
| Total direct aerosol                             | −0.50 [± 0.4]     | −0.55      |
| Direct sulfate aerosol                           | −0.40 [±0.20]     | −0.47      |
| Direct fossil fuel organic carbon                | −0.05 [±0.05]     | −0.04      |
| Direct fossil fuel black carbon                  | +0.2 [±0.15]      | +0.19      |
| Direct biomass burning aerosol                   | +0.03 [±0.12]     | −0.10      |
| Direct nitrate                                   | −0.10 [±0.10]     | −0.17      |
| AIE                                              | −0.70 [−1.1,+0.4] | −0.57      |

IPCC AIE includes cloud albedo affect only, whereas this study includes cloud albedo, cloud lifetime, and semidirect effects.
